# Supplementary material for: Upward and downward colonization of vegetation following the retreat of the Aneto glacier, since the Little Ice Age
Source: Research Square preprint supplement (doi:10.21203/rs.3.rs-8663348/v1), 2026-01-27
Supplement: Supplementary file 1 [file 4c77b9b564d731f4a0930230.docx]

**Upward and downward colonization of vegetation following the retreat of the Aneto glacier, since the Little Ice Age**

*Alpine Botany*

**Pablo Tejero Ibarra1-2*, César Deschamps-Berger, Nahia Carretero-Roque, Juan Ignacio Lopez-Moreno, Jesús Revuelto, Francisco Rojas-Heredia, Ixeia Vidaller, Pierre René, Sébastien Lavergne, Aina Alvarez, Alba López-Varela, Olatz Fernández, Sara Palacio**

1 JACA Herbarium, Instituto Pirenaico de Ecología (CSIC), Av. Nuestra Señora de la Victoria 16, 22700, Jaca, Spain.

2 Botanika Saila, Sociedad de Ciencias Aranzadi, Zorroagagaina 11, 20014 Donostia-San Sebastián, Gipuzkoa, Spain

*ptibarra@ipe.csic.es


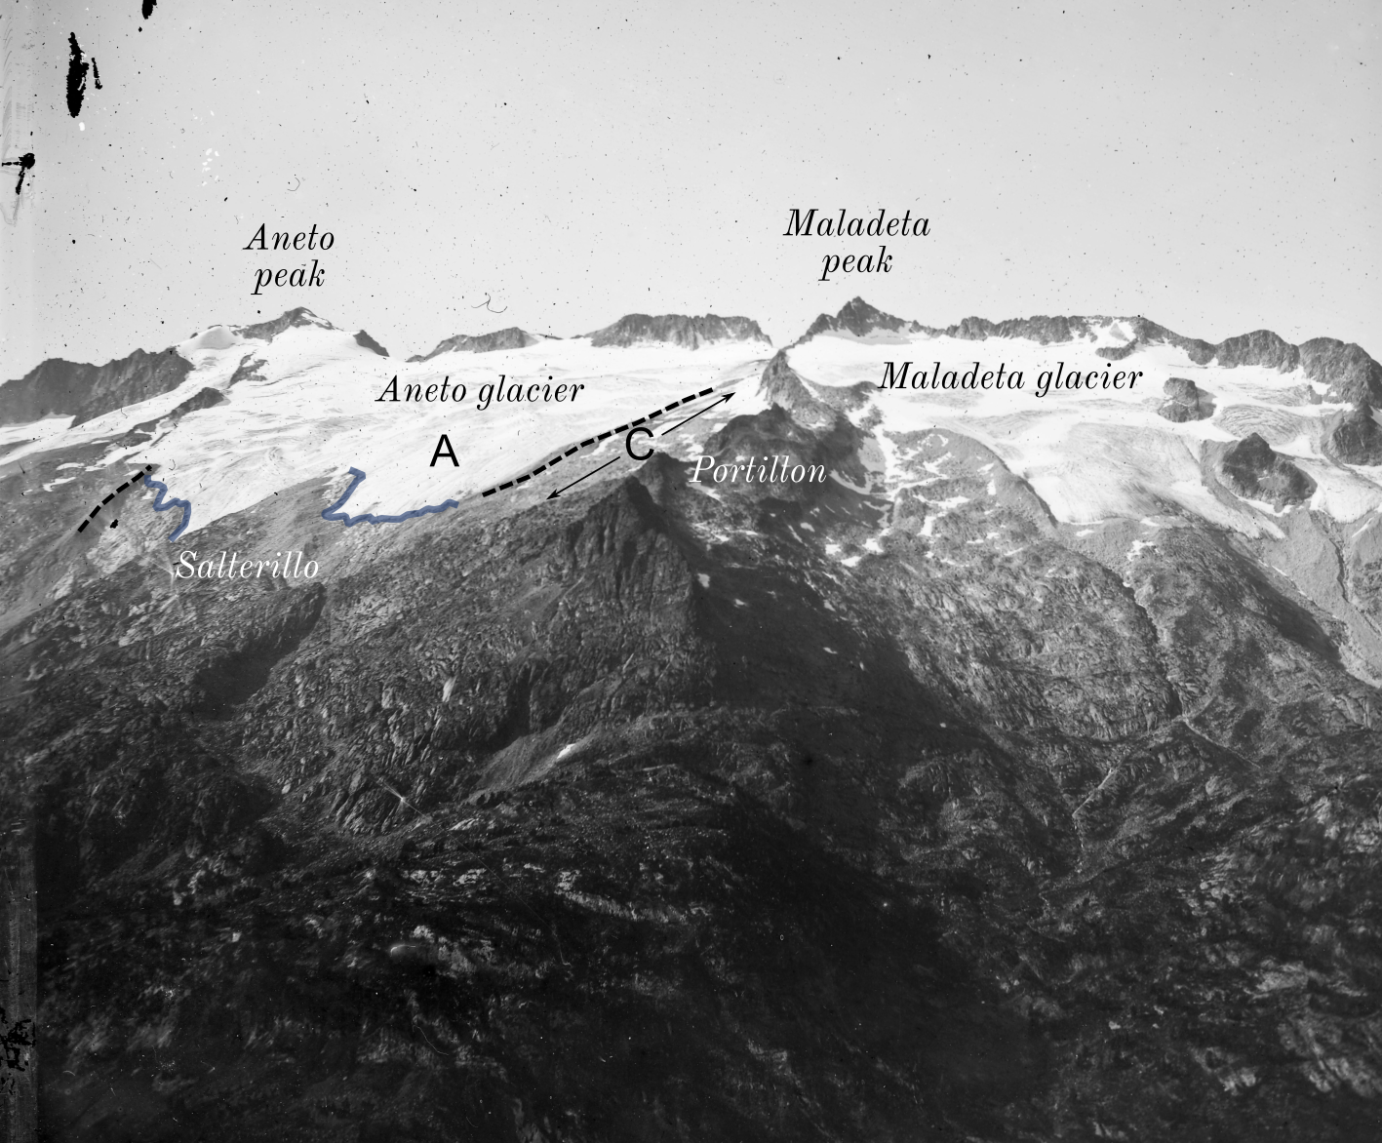


**Fig. S1** Photography attributed to Eugène Trutat on 1 September 1875 (© Fonds Eugène Trutat, Muséum de Toulouse). The photograph was taken close to the Port de Benasque, roughly looking southward (Copyright Museum d’Histoire Naturelle de Toulouse, Fonds Eugène Trutat). The front of the glacier was digitalized (blue line) and projected in geographical coordinates after identification of ground control points with the MonoPlotting tool [(Wiesmann et al. 2012)](https://www.zotero.org/google-docs/?PUTYuy). Lateral moraines are shown in dashed lines.

**
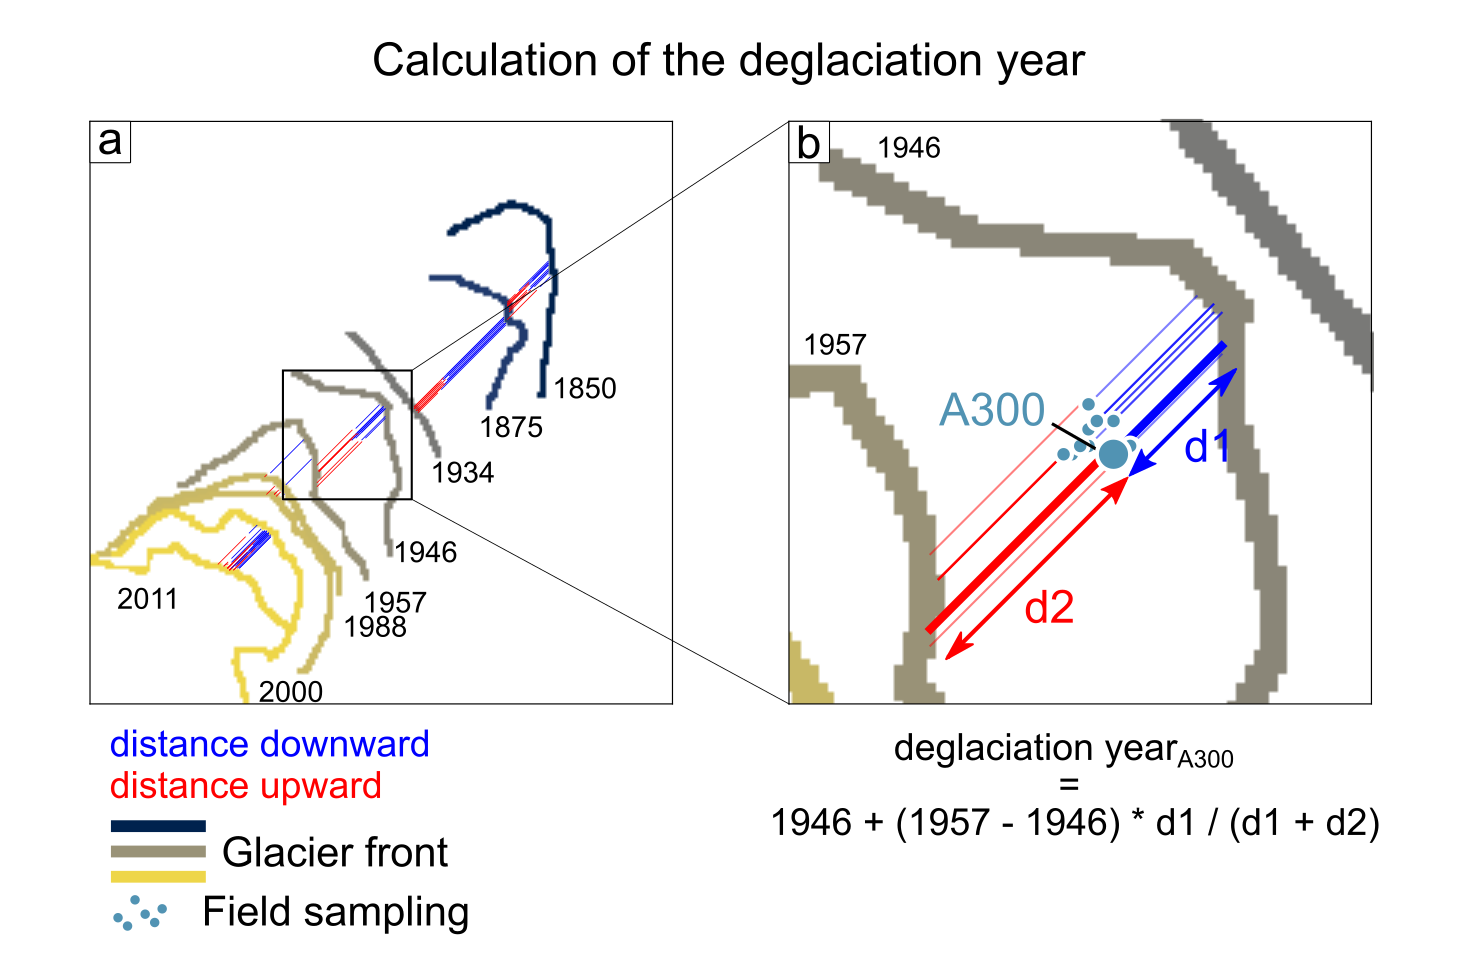
**

**Fig. S2** Method to calculate the deglaciation year of each plot exemplified for A3_00 plot. The distance between the plot and the two closest glacier front positions is calculated and used to interpolate the deglaciation year at the plot position. The distances are calculated along the main slope of a smoothed DEM.


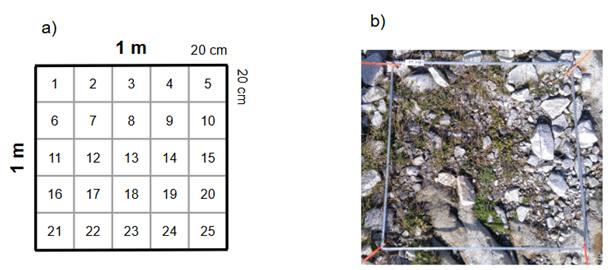


**Fig. S3** Example of a plot (1 m x 1 m) and subplots (20 cm x 20 cm) used in the study. a) Schematic representation. b)Image of a sampling plot (area A5_08). Photo: Pablo Tejero.

**
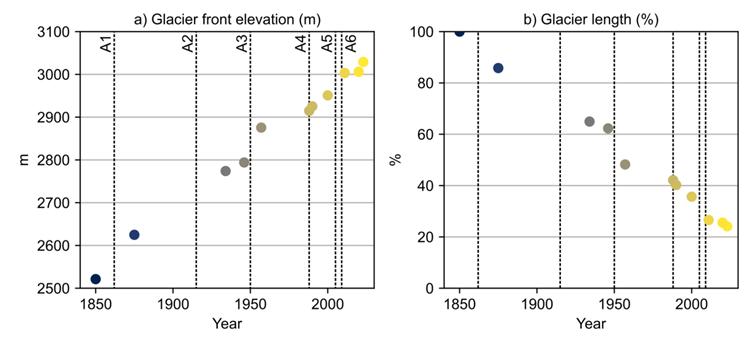
**

**Fig. S4** Dynamics of ice retreat in Aneto glacier**.** a) Elevation of the ice front (lowest point) of the Aneto glacier and b) percentage of the glacier length relative to its 1850 value. The vertical dotted lines show the median deglaciation year of the different sampling sites.


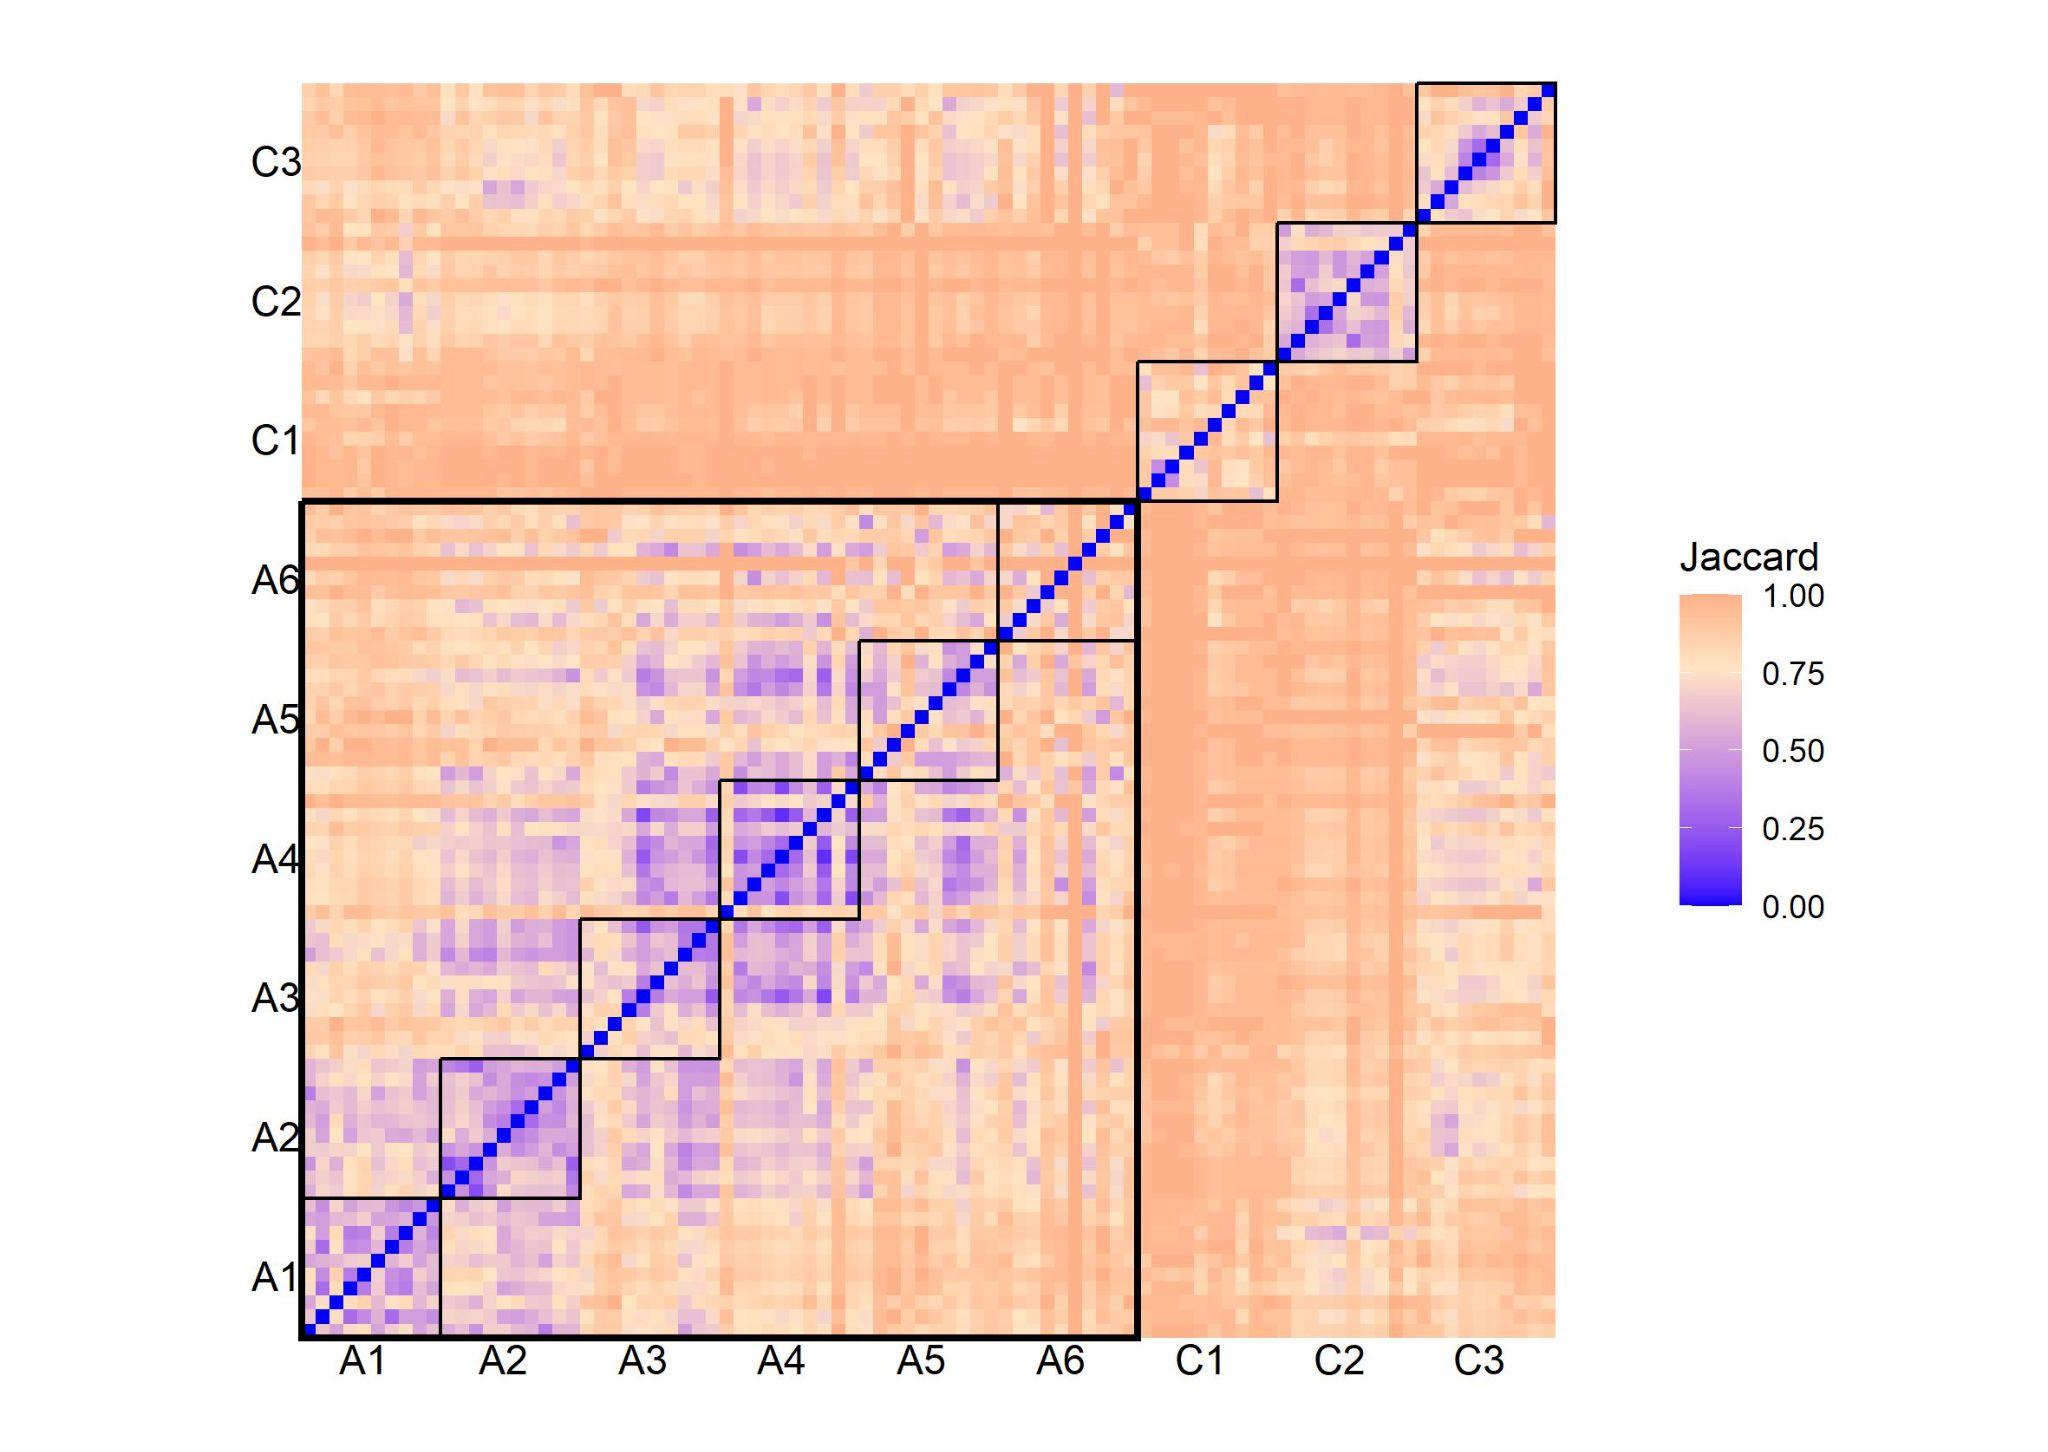


**Fig. S5** Jaccard distance matrix between vegetation plots reflecting differences in species composition.

**
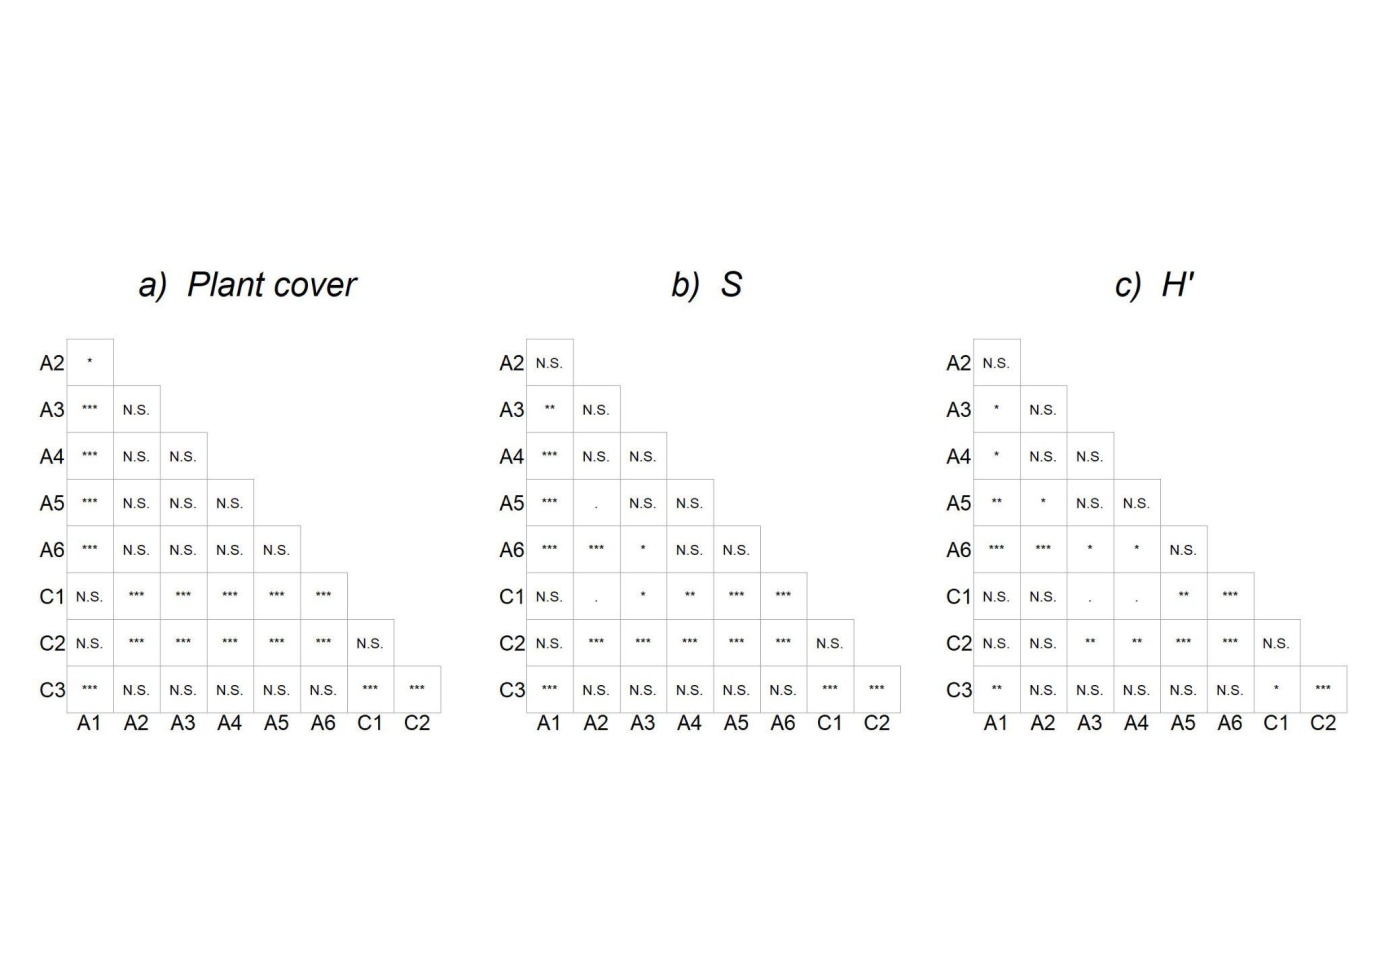
**

**Fig. S6** Post hoc significance for pair wise comparisons of species richness (S), Shannon Index (H’), and vegetation cover.p < 0.01; * p < 0.05; ** p < 0.01; *** p < 0.001; NS = not significant.

**
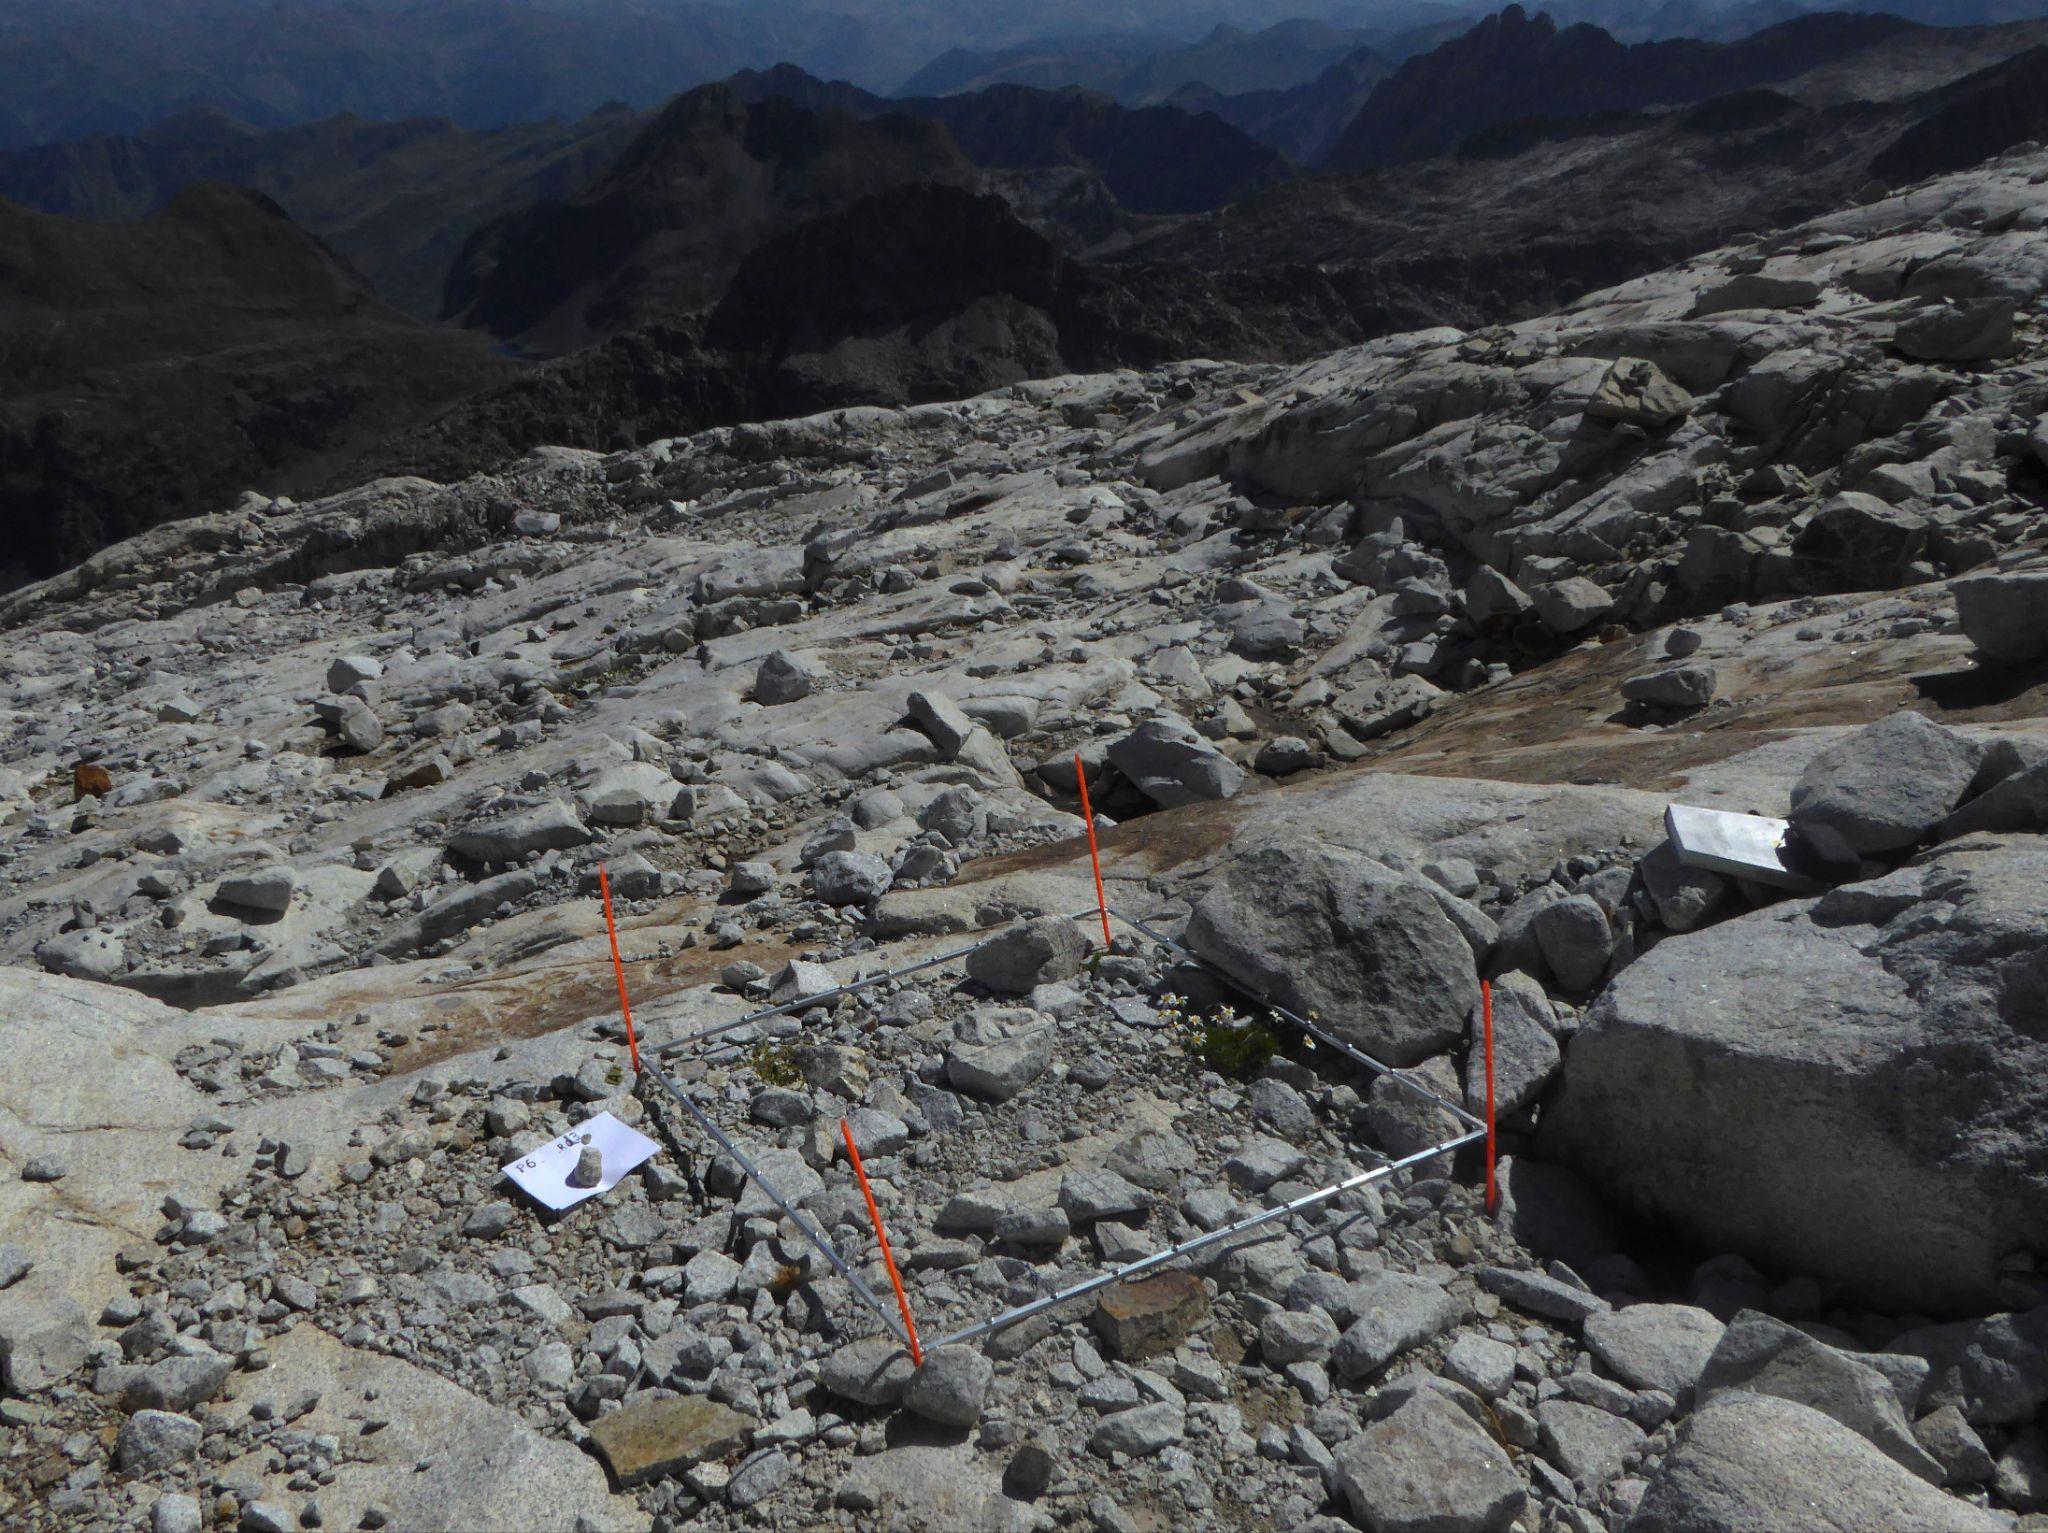
**

**Fig. S7** Extensive granite surface left as a result of Aneto glacier retreat shown from A5 area (plot 03). Photo: Pablo Tejero.

| **Table S1** Inventories used to evaluate the source of colonization (Fernández and Herreros 2014, 2019, 2022). | |
| --- | --- |
| Locality: **Aneto** Years: 2014; 2019; 2022 Autor: Olatz Fernandez, Mª Jesús Herreros  GPS (data) Altitude: 3.404m | |
| *Androsace ciliata*  *Armeria alpina*  *Cerastium alpinum*  *Draba fladnizensis*  *Erigeron uniflorus*  *Linaria alpina*  *Minuartia sedoides*  *Poa alpina* | *Poa laxa*  *Potentilla frigida*  *Pritzelago alpina alpina*  *Ranunculus glacialis*  *Saxifraga bryoides*  *Saxifraga oppositifolia*  *Saxifraga pubescens* |
| Locality: **Col de Portillón**  Year: 2014 Autor: Olatz Fernandez, Mª Jesús Herreros  GPS (data) Altitude: 2.800m | |
| *Agrostis rupestris*  *Alchemilla alpina*  *Armeria alpina*  *Cardamine bellidifolia alpina*  *Cardamine wettesteiniana*  *Cerastium alpinum*  *Cystopteris fragilis*  *Epilobium anagallidifolium*  *Erigeron uniflorus*  *Euphrasia minima*  *Festuca glacialis*  *Galium pyrenaicum*  *Gentiana alpina*  *Leontodon pyrenaicus*  *Leucanthemopsis alpina*  *Linari alpina*  *Luzula spicata* | *Murbeckiella pinnatifida*  *Phyteuma hemisphaericum*  *Poa alpina*  *Poa laxa*  *Potentilla nivalis*  *Saxifraga bryoides*  *Saxigraga moschata*  *Sedum alpestre*  *Sedum rosea*  *Sempervivum montanum*  *Senecio pyrenaicus*  *Silene acaulis*  *Silene rupestris*  *Thymus praecox*  *Trifolium alpinum*  *Vaccinium uliginosum*  *Veronica alpina* |
| Locality: **Salterillo** Year: 2024 Autor: Olatz Fernandez, Pablo Tejero, Nahia Carretero  GPS (data) Altitude: 2.500m | |
| *Alchemilla alpina*  *Alchemilla fissa*  *Allium ericetorum*  *Armeria alpina*  *Calluna vulgaris*  *Campanula rotundifolia*  *Cardamine resedifoia*  *Carex echinata*  *Carex parviflora*  *Carex pyreniaca*  *Carex sempervirens*  *Cerastium cerastoides*  *Dianthus hyssopifolius*  *Euphrasia minima*  *Festuca borderei*  *Festuca eskia*  *Festuca glacialis*  *Festuca nigrescens*  *Gentiana alpina*  *Geum pyrenaicum*  *Homogyne alpina*  *Jasione montana* | *Leontodon dubosii*  *Leontodon hispidus*  *Leucanthemopsis alpina*  *Lotus alpinus*  *Luzula alpinopilosa*  *Nardus stricta*  *Phyteuma hemisphaericum*  *Poa alpina*  *Poa cenisia*  *Polygonum viviparum*  *Potentilla erecta*  *Rhododendron ferrugineum*  *Saxifraga moschata*  *Sempervivum montanum*  *Senecio pyrenaicus*  *Silene acaulis*  *Thymus praecox*  *Trifolium alpinum*  *Trifolium pratense*  *Vaccinium myrtillus*  *Vaccinium uliginosum* |

| **Table S2** List of the most abundant species in the study. Scientific names after Gómez et al. 2020. | | | | | | | | | |
| --- | --- | --- | --- | --- | --- | --- | --- | --- | --- |
|  | **Deglaciated (A)** | | | **Control (C)** | | | **Total** | | |
| **Species** | **Nsite** | **Nplot** | **Ncell** | **Nsite** | **Nplot** | **Ncell** | **Nsite** | **Nplot** | **Ncell** |
| *Poa alpina* | **6** | **49** | **515** | 2 | 9 | 59 | **8** | **58** | **574** |
| *Leucanthemopsis alpina* | **6** | **41** | **363** | 2 | 10 | 48 | **8** | **51** | **411** |
| *Veronica alpina* | **6** | **42** | **336** | 2 | **11** | 56 | **8** | **53** | **392** |
| *Sedum alpestre* | 5 | **43** | **287** | 1 | **13** | 61 | 6 | **56** | **348** |
| *Armeria alpina* | 4 | 23 | **249** | 1 | 3 | 5 | 5 | 26 | **254** |
| *Cerastium cerastoides* | 5 | 25 | 224 | 1 | 4 | 13 | 6 | 29 | 237 |
| *Sagina saginoides* | 5 | 30 | 189 | 1 | 8 | 61 | 6 | 38 | 250 |
| *Festuca glacialis* | 2 | 11 | 196 | 2 | 5 | 35 | 4 | 16 | 231 |
| *Euphrasia minima* | 2 | 14 | 194 | 2 | 10 | 49 | 4 | 24 | 243 |
| *Gnaphalium supinum* | **6** | 29 | 175 | 2 | 5 | 13 | **8** | 34 | 188 |
| *Oxyria dygina* | **6** | **34** | 149 | 1 | 7 | 49 | 7 | **41** | 198 |
| *Saxifraga moschata* | **6** | 18 | 109 | 1 | 6 | 44 | 7 | 24 | 153 |
| *Pritzelago alpina* | 4 | 17 | 107 | 0 | 0 | 0 | 4 | 17 | 107 |
| *Agrostis rupestris* | 3 | 11 | 88 | 3 | **17** | **95** | 6 | 28 | 183 |
| *Sibbaldia procumbens* | 2 | 7 | 71 | **3** | 7 | 26 | 5 | 14 | 97 |
| *Linaria alpina* | **6** | 13 | 42 | 0 | 0 | 0 | 6 | 13 | 42 |
| *Androsace ciliata* | 3 | 8 | 15 | 0 | 0 | 0 | 3 | 8 | 15 |
| *Alchemilla fissa* | 1 | 1 | 8 | 3 | 6 | 43 | 4 | 7 | 51 |
| *Scorzoneroides duboisii* | 2 | 2 | 6 | 2 | **13** | 82 | 4 | 15 | 88 |
| *Vaccinium uliginosum* | 1 | 2 | 4 | 2 | 9 | **119** | 3 | 11 | 123 |
| *Festuca eskia* | 1 | 1 | 1 | 2 | 7 | **112** | 3 | 8 | 113 |
| *Trifolium alpinum* | 0 | 0 | 0 | 2 | 9 | **107** | 2 | 9 | 107 |
| *Thymux praecox* | 0 | 0 | 0 | 2 | 8 | **102** | 2 | 8 | 102 |
| *Carex curvula* | 0 | 0 | 0 | 1 | 9 | 92 | 1 | 9 | 92 |
| *Rhododendron ferrugineum* | 0 | 0 | 0 | 2 | 4 | 22 | 2 | 4 | 22 |

**Appendix 1.** Species list of scientific names used in the study after Gómez et al., (2020).

*Agrostis rupestris* All., *Alchemilla alpina* L., *Alchemilla fissa* Hoern., *Alchemilla saxatilis* Buser., *Allium schoenoprasum* L., *Androsace ciliata* DC., *Antennaria dioica* (L.) Gaertn., *Arabis alpina* L., *Armeria alpine* Willd., *Athyrium distentifolium* Tausch ex Opiz., *Bartsia alpina* L., *Bupleurum angulosum* L., *Calluna vulgaris* (L.) Hull., *Campanula rotundifolia* L., *Campanula scheuchzeri* Vill., *Cardamine bellidifolia* L. *Cardamine resedifolia* L. *Carex curvula* All. *Carex parviflora* Host. *Carex pyrenaica* Wahlenb., *Carex sempervirens* Will., *Cerastium alpinum* L., *Cerastium cerastoides* (L.) Britton., *Cryptogramma crispa* (L.) R. BR. Ex Hook., *Cystopteris fragilis* (L.) Bernh., *Dryopteris oreades* Fomin., *Epilobium anagallidifolium* Lam., *Erigeron uniflorus* L.,*Euphrasia alpina* Lam., *Euphrasia minima* Jack ex DC., *Festuca borderei* (Hack.) K.Richt., *Festuca eskia* Ramond ex DC., *Festuca glacialis* (Miégev. ex Hack.) K.Richt., *Festuca nigrescens* Lam., *Festuca rubra* L., *Festuca yvesii* Sennen & Pau., *Galium marchandii* Roem. & Schult., *Gentiana acaulis* L., *Gentiana alpina* Vill., *Gentianella campestris* (L.) Borner., *Geum montanum* L., *Gnaphalium norvergicum* Gunnerus., *Gnaphalium supinum* L., *Hieracium ramondii* Griseb., *Juncus trifidus* L., *Juncus triglumis* L., *Juniperus communis* L., *Leontodon hispidus* L., *Leontodon pyrenaicus* Gouan., *Leucanthemopsis alpina* (L.) Heywood., *Linaria alpina* (L.) Mill., *Lotus alpinus* (DC.) Ramond., *Luzula alpinopilosa* (Chaix) Breistr., *Luzula spicata* (L.) DC., *Luzula sudetica* (Willd). Schult., *Meum athamanticum* Jacq., *Minuartia sedoides* (L.) Hiern., *Minuartia verna* (L.) Hiern., *Murbeckiella pinnatífida* (Lam.) Rothm., *Nardus stricta* L. *Oreochloa disticha*(Wulfen) Link., *Oxyria digyna* (L. ) Hill., *Parnassia palustris* L., *Pedicularis pyrenaica* J. Guy., *Peucedanum ostruthium* (L.) W.D.J.Koch., *Phyteuma hemisphaericum* L., *Pilosella breviscapa* (DC.) Soják., *Pilosella lactucella* (Wallr.) P.D.Sell & C.West., *Pinguicula vulgaris* L., *Plantago alpina* L., *Poa alpina* L., *Poa cenisia* All., *Poa glauca* Vahl., *Poa laxa* Haenke., *Potentilla nivalis* Lapeyr., P*otentilla pyrenaica* Ramond., *Primula integrifolia* L., *Pritzelago alpina* (L.) O. Kuntze., *Pulsatilla vernalis* (L.) Mill., *Ranunculus glacialis* L., *Rhododendron ferrugineum* L., *Sagina saginoides* (L.) Karsten., *Salix herbacea* L., *Saxifraga bryoides* L., *Saxifraga moschata* Wulfen., *Saxifraga oppositifolia* L., *Saxifraga pubescens* ssp *iratiana* (F.W. Schultz)., *Saxifraga stellaris* L., *Scorzoneroides duboisii* (Sennen) Greuter., Sedum alpestre Vill., Sedum atratum L., *Sedum rosea* (L.) Scop., *Selaginella selaginoides* (L.) P.Beauv., *Selinum pyrenaeum* (L.) Gouan., *Sempervivum montanum* L., *Senecio pyrenaicus* L., *Seseli montanum* L., *Sibbaldia procumbens* L., *Silene acaulis* (L.) Jacq., *Silene rupestris* L., *Soldanella alpina* L., *Succisa pratensis* Moench., *Taraxacum pyrenaicum* Reut., *Thesium pyrenaicum* L., *Thymus praecox* Opiz., *Trichophorum cespitosum* (L.) Hartm., *Trifolium alpinum* L., *Trifolium pratense* L., *Vaccinium myrtillus* L., *Vaccinium uliginosum* L., *Veronica alpina* L., *Veronica nummularia* Gouan., *Veronica ponae* Gouan., *Viola biflora* L., *Viola palustris* L.
