# Supplementary material for: Upward and downward colonization of vegetation following the retreat of the Aneto glacier, since the Little Ice Age
Source: Research Square preprint supplement (doi:10.21203/rs.3.rs-8663348/v1), 2026-01-27
Supplement: Supplementary file 2 [file 9ec7c963a01f9b320bdc3b59.xlsx]

## Sheet: Hoja2
Upward and downward colonization of vegetation following the retreat of the Aneto glacier, since the Little Ice Age
Alpine Botany
Pablo Tejero Ibarra1-2*, César Deschamps-Berger, Nahia Carretero-Roque, Juan Ignacio Lopez-Moreno, Jesús Revuelto, Francisco Rojas-Heredia, Ixeia Vidaller, Pierre René, Sébastien Lavergne, Aina Alvarez, Alba López-Varela, Olatz Fernández, Sara Palacio
1 JACA Herbarium, Instituto Pirenaico de Ecología (CSIC), Av. Nuestra Señora de la Victoria 16, 22700, Jaca, Spain.
2 Botanika Saila, Sociedad de Ciencias Aranzadi, Zorroagagaina 11, 20014 Donostia-San Sebastián, Gipuzkoa, Spain
*ptibarra@ipe.csic.es

## Sheet: Species abundance per plot
Site_Plot	Agrostis rupestris	Alchemilla alpina	Alchemilla fissa	Alchemilla saxatilis	Allium schoenoprasum	Androsace ciliata	Antennaria dioica	Arabis alpina	Armeria alpina	Athyrium distentifolium	Bartsia alpìna	Bupleurum angulosum	Calluna vulgaris	Campanula rotundifolia	Campanula scheuchzeri	Cardamine bellidifolia	Cardamine resedifolia	Carex curvula	Carex parviflora	Carex pyrenaica	Carex sempervirens	Carex sp	Cerastium alpinum	Cerastium cerastoides	Cryptogramma crispa	Cystopteris fragilis	Dryopteris oreades	Epilobium anagallidifolium	Erigeron uniflorus	Euphrasia alpina	Euphrasia minima	Festuca borderei	Festuca eskia	Festuca glacialis	Festuca nigrescens	Festuca rubra	Festuca yvesii	Galium marchandii	Gentiana acaulis	Gentiana alpina	Gentianella campestris	Geum montanum	Gnaphalium norvergicum	Gnaphalium supinum	Hieracium ramondii	Juncus trifidus	Juncus triglumis	Juniperus communis	Leontodon hispidus
A1_00	0	0	0	0	0	0	0	0	8	0	0	0	0	0	0	0	7	0	0	0	0	0	0	0	0	0	0	0	0	0	2	0	0	15	0	0	0	0	0	0	0	0	0	0	0	0	0	0	0
A1_01	0	0	0	0	0	0	0	0	7	0	0	0	0	0	0	1	0	0	0	0	0	0	0	0	0	0	0	0	0	0	16	0	0	23	0	0	0	0	0	0	0	0	0	5	0	0	0	0	0
A1_02	0	1	0	0	0	0	0	0	7	0	0	0	0	0	0	0	1	0	0	0	0	0	0	0	0	0	2	0	0	0	0	0	0	21	0	0	0	0	0	0	0	0	0	0	0	0	0	0	0
A1_03	8	0	0	0	0	0	0	0	15	0	0	0	0	0	0	6	0	0	0	0	0	0	0	0	0	0	0	0	0	0	24	0	1	25	0	0	0	0	0	0	0	0	0	20	0	0	0	0	0
A1_04	6	0	0	0	0	0	0	0	13	0	0	0	0	0	0	1	0	0	9	0	8	0	0	0	0	0	0	0	0	0	14	0	0	24	0	0	0	0	0	0	0	0	0	20	0	0	0	0	10
A1_05	0	5	8	0	0	0	0	0	22	0	0	0	0	1	0	20	2	0	1	0	0	0	0	0	0	0	0	0	0	0	21	0	0	24	0	0	0	0	0	0	0	0	0	1	0	0	0	0	0
A1_06	0	0	0	0	0	0	0	0	21	0	0	0	0	0	0	14	0	0	0	0	0	0	0	0	0	0	0	0	0	0	22	0	0	23	0	0	0	0	0	0	0	0	0	9	0	0	0	0	0
A1_07	10	0	0	0	0	0	0	0	10	0	0	0	0	0	0	11	0	0	0	0	0	0	0	0	0	0	0	0	0	0	16	0	0	20	0	0	0	0	0	0	0	0	0	11	0	0	0	0	0
A1_08	0	0	0	0	0	0	0	0	11	0	0	0	0	0	0	1	0	0	0	0	0	0	0	0	0	0	2	0	0	0	14	0	0	10	0	0	0	0	0	0	0	0	0	1	0	0	0	0	0
A1_09	0	0	0	0	0	0	0	0	4	0	0	0	0	0	0	0	0	0	0	0	0	0	0	0	0	0	0	0	0	0	22	18	0	9	0	0	0	0	0	0	0	0	0	7	0	0	0	0	0
A2_00	0	0	0	0	0	0	0	0	14	0	0	0	0	0	0	0	6	0	0	0	0	0	2	0	0	0	0	0	0	0	0	0	0	0	0	0	0	0	0	0	0	0	0	0	0	0	0	0	0
A2_01	0	0	0	0	0	0	0	0	7	0	0	0	0	0	0	0	3	0	0	0	0	0	0	0	0	0	0	0	0	0	0	0	0	0	0	0	0	0	0	0	0	0	0	0	0	0	0	0	0
A2_02	0	0	0	0	0	0	0	0	12	0	0	0	0	0	0	0	5	0	0	0	0	0	0	0	0	0	0	0	0	0	0	0	0	0	0	0	0	0	0	0	0	0	0	0	0	0	0	0	0
A2_03	1	0	0	0	0	0	0	0	9	0	0	0	0	0	0	0	5	0	0	0	0	0	0	0	0	0	2	0	0	0	0	0	0	0	0	0	0	0	0	0	0	0	0	6	0	0	0	0	0
A2_04	19	0	0	0	0	0	0	0	16	0	0	0	0	0	0	0	0	0	0	15	0	0	0	0	0	0	0	0	0	0	8	0	0	0	0	0	0	0	0	0	0	0	0	20	0	0	0	0	0
A2_05	17	0	0	0	0	0	0	0	13	0	0	0	0	0	0	0	0	0	0	0	0	0	0	14	0	0	0	0	0	0	1	0	0	0	0	0	0	0	0	0	0	0	0	7	0	0	0	0	0
A2_06	6	0	0	0	0	0	0	0	17	0	0	0	0	0	0	0	0	0	0	0	0	0	0	0	0	0	0	0	0	0	12	0	0	0	0	0	0	0	0	0	0	0	0	2	0	0	0	0	0
A2_07	3	0	0	0	0	0	0	0	13	0	0	0	0	0	0	0	2	0	0	0	0	0	0	1	0	0	0	1	0	0	21	0	0	2	0	0	0	0	0	0	0	0	0	8	0	0	0	0	0
A2_08	3	0	0	0	0	0	0	0	9	0	0	0	0	0	0	0	0	0	0	0	0	0	0	0	0	0	3	1	0	0	1	0	0	0	0	0	0	0	0	0	0	0	0	8	0	0	0	0	0
A2_09	0	0	0	0	0	0	0	0	9	0	0	0	0	0	0	0	0	0	0	0	0	0	0	0	0	0	0	0	0	0	0	0	0	0	0	0	0	0	0	0	0	0	0	1	0	0	0	0	0
A3_00	13	0	0	0	0	0	0	0	0	0	0	0	0	0	0	0	0	0	0	10	0	0	0	0	0	0	0	0	0	0	0	0	0	0	3	0	0	0	0	0	0	0	0	6	0	0	0	0	0
A3_01	2	0	0	0	0	0	0	0	0	0	0	0	0	0	0	0	0	0	0	0	0	0	0	0	0	0	0	0	0	0	0	0	0	0	0	0	0	0	0	0	0	0	0	0	0	0	0	0	0
A3_02	0	0	0	0	0	0	0	0	0	0	0	0	0	0	0	0	0	0	0	0	0	0	0	1	0	0	0	0	0	0	0	0	0	0	1	0	0	0	0	0	0	0	0	0	0	0	0	0	0
A3_03	0	0	0	0	0	0	0	0	0	0	0	0	0	0	0	0	1	0	0	0	0	0	0	7	0	0	0	0	0	0	0	0	0	0	0	0	0	0	0	0	0	0	0	1	0	0	0	0	0
A3_04	0	0	0	0	0	0	0	0	0	0	0	0	0	0	0	0	0	0	0	0	0	0	0	14	0	0	0	2	0	0	0	0	0	0	0	0	0	0	0	0	0	0	0	6	0	0	0	0	0
A3_05	0	0	0	0	0	0	0	0	0	0	0	0	0	0	0	0	0	0	0	0	0	0	0	12	0	0	0	2	0	0	0	0	0	0	0	0	0	0	0	0	0	0	0	0	0	0	0	0	0
A3_06	0	0	0	0	0	0	0	0	0	0	0	0	0	0	0	0	0	0	0	0	0	0	0	0	0	0	0	0	0	0	0	0	0	0	0	0	0	0	0	0	0	0	0	0	0	0	0	0	0
A3_07	0	0	0	0	0	0	0	0	6	0	0	0	0	0	0	0	1	0	0	0	0	0	0	0	0	0	0	0	0	0	0	0	0	0	2	0	0	0	0	0	0	0	0	1	0	0	0	0	0
A3_08	0	0	0	0	0	0	0	0	5	0	0	0	0	0	0	0	0	0	0	0	0	0	0	0	0	0	0	0	0	0	0	0	0	0	0	0	0	0	0	0	0	0	0	2	0	0	0	0	0
A3_09	0	0	0	0	0	0	0	0	0	0	0	0	0	0	0	0	0	0	0	0	0	0	0	1	0	0	0	0	0	0	0	0	0	0	0	0	0	0	0	0	0	0	0	11	0	0	0	0	0
A4_00	0	0	0	0	0	0	0	0	0	0	0	0	0	0	0	0	0	0	0	0	0	0	0	9	0	0	0	0	0	0	0	0	0	0	0	0	0	0	0	0	0	0	1	0	0	0	0	0	0
A4_01	0	0	0	0	0	0	0	0	0	0	0	0	0	0	0	0	0	0	0	0	0	0	0	21	0	0	0	0	0	0	0	0	0	0	0	0	0	0	0	0	0	0	0	0	0	0	0	0	0
A4_02	0	0	0	0	0	2	0	0	1	0	0	0	0	0	0	0	0	0	0	0	0	0	0	4	0	0	0	4	0	0	0	0	0	0	0	0	0	0	0	0	0	0	0	0	0	0	0	0	0
A4_03	0	0	0	0	0	0	0	0	0	0	0	0	0	0	0	0	0	0	0	0	0	0	0	19	0	0	0	3	0	0	0	0	0	0	0	0	0	0	0	0	0	0	6	1	0	0	0	0	0
A4_04	0	0	0	0	0	0	0	0	0	0	0	0	0	0	0	0	0	0	0	0	0	0	0	8	0	0	0	1	0	0	0	0	0	0	0	0	0	0	0	0	0	0	0	1	0	0	0	0	0
A4_05	0	0	0	0	0	0	0	0	0	0	0	0	0	0	0	0	0	0	0	0	0	0	0	4	0	0	0	2	0	0	0	0	0	0	0	0	0	0	0	0	0	0	0	2	0	0	0	0	0
A4_06	0	0	0	0	0	2	0	0	0	0	0	0	0	0	0	0	0	0	0	0	0	0	0	10	0	0	0	0	0	0	0	0	0	0	0	0	0	0	0	0	0	0	0	0	0	0	0	0	0
A4_07	0	0	0	0	0	0	0	0	0	0	0	0	0	0	0	0	0	0	0	0	0	0	0	15	0	0	0	5	0	0	0	0	0	0	0	0	0	0	0	0	0	0	0	12	0	0	0	0	0
A4_08	0	0	0	0	0	0	0	0	0	0	0	0	0	0	0	0	0	0	0	0	0	0	0	2	0	0	0	0	0	0	0	0	0	0	0	0	0	0	0	0	0	0	0	0	0	0	0	0	0
A4_09	0	0	0	0	0	0	0	7	0	0	0	0	0	0	0	0	0	0	0	0	0	0	0	13	0	0	0	2	0	0	0	0	0	0	0	0	0	0	0	0	0	0	0	0	0	0	0	0	0
A5_00	0	0	0	0	0	0	0	0	0	0	0	0	0	0	0	0	0	0	0	0	0	0	0	0	0	0	0	0	0	0	0	0	0	0	0	0	0	0	0	0	0	0	0	0	0	0	0	0	0
A5_01	0	0	0	0	0	0	0	1	0	0	0	0	0	0	0	0	0	0	0	0	0	0	0	6	0	0	0	2	0	0	0	0	0	0	0	0	0	0	0	0	0	0	0	0	0	0	0	0	0
A5_02	0	0	0	0	0	2	0	0	0	0	0	0	0	0	0	0	0	0	0	0	0	0	0	1	0	0	0	1	0	0	0	0	0	0	0	0	0	0	0	0	0	0	0	0	0	0	0	0	0
A5_03	0	0	0	0	0	0	0	0	0	0	0	0	0	0	0	0	0	0	0	0	0	0	4	0	0	0	0	0	0	0	0	0	0	0	0	0	0	0	0	0	0	0	0	0	0	0	0	0	0
A5_04	0	0	0	0	0	0	0	4	0	0	0	0	0	0	0	0	0	0	0	0	0	0	0	5	0	0	0	0	0	0	0	0	0	0	0	0	0	0	0	0	0	0	0	0	0	0	0	0	0
A5_05	0	0	0	0	0	0	0	2	0	0	0	0	0	0	0	0	0	0	0	0	0	2	0	10	0	0	0	2	0	0	0	0	0	0	0	0	0	0	0	0	0	0	0	0	0	0	0	0	0
A5_06	0	0	0	0	0	0	0	0	0	0	0	0	0	0	0	0	0	0	0	0	0	0	0	24	0	0	0	1	0	0	0	0	0	0	0	0	0	0	0	0	0	0	0	0	0	0	0	0	0
A5_07	0	0	0	0	0	0	0	0	0	0	0	0	0	0	0	0	0	0	0	0	0	0	0	14	0	0	0	1	0	0	0	0	0	0	0	0	0	0	0	0	0	0	0	1	0	0	0	0	0
A5_08	0	0	0	0	0	1	0	1	0	0	0	0	0	0	0	0	0	0	0	0	0	0	0	2	0	0	0	2	0	0	0	0	0	0	0	0	0	0	0	0	0	0	0	3	0	0	0	0	0
A5_09	0	0	0	0	0	0	0	0	0	0	0	0	0	0	0	0	0	0	0	0	0	0	0	0	0	0	0	10	0	0	0	0	0	0	0	0	0	0	0	0	0	0	1	0	0	0	0	0	0
A6_00	0	0	0	0	0	1	0	0	0	0	0	0	0	0	0	0	0	0	0	0	0	0	0	0	0	0	0	0	0	0	0	0	0	0	0	0	0	0	0	0	0	0	0	0	0	0	0	0	0
A6_01	0	0	0	0	0	2	0	0	0	0	0	0	0	0	0	0	0	0	0	0	0	0	0	0	0	0	0	2	0	0	0	0	0	0	0	0	0	0	0	0	0	0	0	1	0	0	0	0	0
A6_02	0	0	0	0	0	0	0	0	0	0	0	0	0	0	0	0	0	0	0	0	0	0	0	0	0	0	0	0	1	0	0	0	0	0	0	0	0	0	0	0	0	0	0	0	0	0	0	0	0
A6_03	0	0	0	0	0	0	0	0	0	0	0	0	0	0	0	0	0	0	0	0	0	0	0	0	0	0	0	0	0	0	0	0	0	0	0	0	0	0	0	0	0	0	0	0	0	0	0	0	0
A6_04	0	0	0	0	0	1	0	0	0	0	0	0	0	0	0	0	0	0	0	0	0	0	0	0	0	0	0	4	0	0	0	0	0	0	0	0	0	0	0	0	0	0	0	0	0	0	0	0	0
A6_05	0	0	0	0	0	0	0	2	0	0	0	0	0	0	0	0	0	0	0	0	0	0	0	0	0	0	0	0	0	0	0	0	0	0	0	0	0	0	0	0	0	0	0	0	0	0	0	0	0
A6_06	0	0	0	0	0	0	0	0	0	0	0	0	0	0	0	0	0	0	0	0	0	0	0	0	0	0	0	0	0	0	0	0	0	0	0	0	0	0	0	0	0	0	0	0	0	0	0	0	0
A6_07	0	0	0	0	0	0	0	0	0	0	0	0	0	0	0	0	0	0	0	0	0	0	0	7	0	0	0	0	0	0	0	0	0	0	0	0	0	0	0	0	0	0	0	0	0	0	0	0	0
A6_08	0	0	0	0	0	0	0	0	0	0	0	0	0	0	0	0	0	0	0	0	0	0	0	0	0	0	0	0	0	0	0	0	0	0	0	0	0	0	0	0	0	0	0	0	0	0	0	0	0
A6_09	0	0	0	0	0	4	0	0	0	0	0	0	0	0	0	0	0	0	0	0	0	0	0	0	0	0	0	0	0	0	0	0	0	0	0	0	0	0	0	0	0	0	0	1	0	0	0	0	0
C1_00	0	0	5	0	0	0	0	0	0	1	0	17	0	4	12	0	0	0	0	0	9	0	0	0	0	0	0	0	0	0	0	0	25	0	0	0	0	0	0	0	0	4	0	0	0	0	0	0	0
C1_01	0	0	0	0	8	0	0	0	0	0	0	0	1	0	0	0	0	0	0	3	23	0	0	0	0	0	0	0	0	0	0	0	0	0	0	0	0	2	0	0	0	0	0	0	0	0	0	1	16
C1_02	0	0	0	0	1	0	0	0	0	0	20	0	0	0	0	0	0	0	0	0	19	0	0	0	0	0	0	0	0	0	0	0	0	0	1	0	0	0	0	0	0	0	0	0	0	0	0	1	12
C1_03	0	0	0	1	1	0	0	0	0	3	0	2	0	0	0	0	0	0	0	0	1	0	0	0	0	0	1	0	0	0	0	0	0	0	16	0	0	6	0	0	0	5	0	0	0	0	0	0	10
C1_04	6	2	4	0	0	0	0	0	0	0	2	0	1	2	4	0	0	0	0	0	23	0	0	0	0	0	0	0	0	0	2	0	9	0	0	0	0	0	0	0	0	13	0	0	0	0	0	0	1
C1_05	3	0	0	0	2	0	0	0	0	0	0	0	0	0	0	0	0	0	0	0	0	0	0	0	8	0	0	3	0	0	0	3	0	0	0	0	0	0	0	0	0	0	0	0	0	0	0	0	0
C1_06	3	0	0	0	0	0	0	0	0	0	0	0	0	0	0	0	0	0	0	1	6	0	0	0	0	0	0	2	0	0	0	0	2	0	0	0	0	0	0	0	0	0	0	0	0	0	0	1	2
C1_07	0	0	0	0	0	0	0	0	0	0	3	0	0	0	0	1	0	0	0	22	6	0	0	0	0	0	0	0	0	0	0	0	0	7	0	0	0	0	0	0	0	0	0	0	0	0	0	0	0
C1_08	3	0	0	0	0	0	0	0	0	0	0	6	0	0	17	0	0	0	0	0	0	0	0	0	0	0	0	0	0	0	0	0	25	0	0	0	0	0	0	0	0	15	0	0	0	0	0	0	0
C1_09	0	0	3	0	0	0	0	0	0	0	1	0	0	0	15	0	0	0	0	0	0	0	0	0	0	0	0	0	0	0	1	0	21	0	0	2	0	0	0	0	0	9	0	0	0	0	0	0	0
C2_00	1	0	0	0	0	0	0	0	0	0	0	0	0	0	0	0	0	21	0	0	0	0	0	0	0	0	0	0	0	0	8	0	0	0	3	0	7	0	0	7	0	0	0	0	0	10	0	0	0
C2_01	0	0	0	0	0	0	0	0	0	0	0	0	0	0	0	0	3	12	0	0	0	0	0	0	0	0	0	0	1	0	3	0	0	9	2	0	2	0	0	6	0	0	0	0	0	7	0	0	0
C2_02	13	8	4	0	0	0	0	0	0	0	0	0	0	0	0	0	3	2	0	0	0	0	0	0	0	0	0	0	0	7	7	0	0	0	0	0	3	0	0	1	0	0	0	3	0	0	0	0	0
C2_03	12	4	22	0	0	0	0	0	0	0	0	0	0	0	0	0	10	4	0	0	0	0	0	0	0	0	0	0	15	0	1	0	0	0	0	0	1	0	0	4	0	0	0	6	0	0	5	0	0
C2_04	11	1	0	0	0	0	0	0	0	0	0	0	0	0	0	2	1	0	0	0	0	0	0	0	0	0	0	0	0	3	6	0	0	0	2	0	0	0	0	19	0	0	0	2	0	9	0	2	0
C2_05	0	0	0	0	0	0	0	0	0	0	0	0	1	0	0	0	1	14	0	0	0	0	0	0	0	0	0	0	1	0	12	0	0	2	0	0	0	0	0	1	5	0	0	0	0	11	0	0	0
C2_06	0	2	0	0	0	0	1	0	0	0	0	0	0	0	0	2	0	13	0	0	0	0	0	0	0	0	0	0	0	1	3	0	0	14	0	0	0	0	0	2	0	0	0	0	0	4	0	0	0
C2_07	2	0	0	0	0	0	0	0	0	0	0	0	0	0	0	2	1	4	0	0	0	0	0	0	0	0	0	0	1	1	0	0	0	3	1	0	0	0	1	4	0	0	0	0	0	2	0	4	0
C2_08	0	0	0	0	0	0	0	0	0	0	0	0	0	5	11	1	0	4	0	0	0	0	0	0	0	0	0	0	0	0	0	0	22	0	0	0	0	0	3	1	0	0	0	0	0	0	0	0	0
C2_09	6	0	0	0	0	0	0	0	0	0	0	0	0	0	0	0	0	18	0	0	0	0	0	0	0	0	0	0	0	0	6	0	8	0	0	0	0	0	0	1	0	0	0	0	0	0	0	0	0
C3_00	14	0	0	0	0	0	0	0	0	0	0	0	0	0	0	0	0	0	0	0	0	0	0	7	2	0	0	0	0	0	0	0	0	0	0	0	4	0	0	0	0	0	0	0	0	0	0	0	0
C3_01	2	0	0	0	0	0	0	0	1	0	0	0	0	0	0	0	0	0	0	0	0	0	0	3	0	0	0	0	0	0	0	0	0	0	0	0	0	0	0	0	0	0	0	1	0	0	0	0	0
C3_02	2	0	0	0	0	0	0	0	1	0	0	1	0	0	0	0	7	0	0	0	0	0	0	2	1	0	0	0	0	0	0	0	0	0	0	0	0	0	0	0	0	0	0	1	0	0	0	0	0
C3_03	5	0	0	0	0	0	0	0	0	2	0	0	0	0	0	0	0	0	0	0	0	0	0	1	7	4	4	6	0	0	0	0	0	0	0	0	0	0	0	0	0	0	0	0	1	0	0	0	0
C3_04	4	0	5	0	0	0	0	0	0	0	0	0	0	0	0	0	0	0	0	0	0	0	0	0	0	0	2	8	0	0	0	0	0	0	0	0	0	0	0	0	0	0	0	0	0	0	0	0	0
C3_05	6	0	0	0	0	0	0	0	0	0	0	0	0	0	0	0	0	0	0	0	0	0	0	0	0	0	1	7	4	0	0	0	0	0	0	0	0	0	0	0	0	0	0	0	0	0	0	0	0
C3_06	2	0	0	0	0	0	0	0	0	0	0	0	0	0	0	0	0	0	0	0	0	0	0	0	0	0	0	2	0	0	0	0	0	0	0	0	0	0	0	0	0	0	0	0	0	0	0	0	0
C3_07	0	0	0	0	0	0	0	0	0	0	0	0	0	0	0	0	0	0	0	0	0	0	2	0	0	0	0	0	0	0	0	0	0	0	0	0	0	0	0	0	0	0	0	0	0	0	0	0	0
C3_08	0	0	0	0	0	0	0	0	3	0	0	0	0	0	0	0	0	0	0	0	0	0	0	0	0	0	0	3	0	0	0	0	0	0	0	0	0	0	0	0	0	0	0	0	0	0	0	0	0
C3_09	0	0	0	0	0	0	0	0	0	0	0	0	0	0	0	0	0	0	0	0	0	0	0	0	0	0	0	0	0	0	0	0	0	0	0	0	0	0	0	0	0	0	0	0	0	0	0	0	0
[truncated: 66 more columns]

## Sheet: Canopy
Plot	Site	Soil (%)	Rock (%)	Cover (%)	Total
A1_00	A1	4.8	54.8	40.4	100
A1_01	A1	6.4	42	51.6	100
A1_02	A1	1.6	58	40.4	100
A1_03	A1	10	58.8	31.2	100
A1_04	A1	4.4	28.4	67.2	100
A1_05	A1	18.8	27.6	53.6	100
A1_06	A1	12.8	36	51.2	100
A1_07	A1	6	48.4	45.6	100
A1_08	A1	0	61.2	38.8	100
A1_09	A1	11.2	48.4	40.4	100
A2_00	A2	2.8	80	17.2	100
A2_01	A2	0	84.8	15.2	100
A2_02	A2	2	80	18	100
A2_03	A2	4.8	76.8	18.4	100
A2_04	A2	6.8	53.2	40	100
A2_05	A2	0.4	60	39.6	100
A2_06	A2	13.6	54.4	32	100
A2_07	A2	7.2	66	26.8	100
A2_08	A2	1.6	80.4	18	100
A2_09	A2	3.6	80	16.4	100
A3_00	A3	5.2	72	22.8	100
A3_01	A3	1.2	83.2	15.6	100
A3_02	A3	1.6	90	8.4	100
A3_03	A3	0	91.2	8.8	100
A3_04	A3	2.8	68	29.2	100
A3_05	A3	0.8	85.6	13.6	100
A3_06	A3	0	92.8	7.2	100
A3_07	A3	1.2	88	10.8	100
A3_08	A3	3.2	73.2	23.6	100
A3_09	A3	4.8	81.2	14	100
A4_00	A4	47.0588	39.916	13.0252	100
A4_01	A4	19.2623	59.0164	21.7213	100
A4_02	A4	5.62249	90.3614	4.01606	100
A4_03	A4	16.8103	52.5862	30.6034	100
A4_04	A4	4.64135	76.7932	18.5654	100
A4_05	A4	4.97925	84.6473	10.3734	100
A4_06	A4	11.2554	73.1602	15.5844	100
A4_07	A4	14.7208	59.8985	25.3807	100
A4_08	A4	6.30252	85.2941	8.40336	100
A4_09	A4	8.4	74	17.6	100
A5_00	A5	0	81.6	18.4	100
A5_01	A5	20.4	74.4	5.2	100
A5_02	A5	26.8	70	3.2	100
A5_03	A5	5.2	83.6	11.2	100
A5_04	A5	6.8	85.6	7.6	100
A5_05	A5	0	89.2	10.8	100
A5_06	A5	0	75.6	24.4	100
A5_07	A5	0	90.8	9.2	100
A5_08	A5	0	89.2	10.8	100
A5_09	A5	0	92.8	7.2	100
A6_00	A6	6.8	91.6	1.6	100
A6_01	A6	22	69.2	8.8	100
A6_02	A6	14	78.8	7.2	100
A6_03	A6	58	35.2	6.8	100
A6_04	A6	8.4	84.8	6.8	100
A6_05	A6	21.6	76.8	1.6	100
A6_06	A6	28.8	68.8	2.4	100
A6_07	A6	9.2	78.3	12.5	100
A6_08	A6	6.4	90	3.6	100
A6_09	A6	1.6	89.2	9.2	100
C1_00	C1	0	5.2	94.8	100
C1_01	C1	2	39.2	58.8	100
C1_02	C1	4.8	5.6	89.6	100
C1_03	C1	10	48.4	41.6	100
C1_04	C1	0	8.4	91.6	100
C1_05	C1	0	80	20	100
C1_06	C1	0	89.6	10.4	100
C1_07	C1	14.4	50.8	34.8	100
C1_08	C1	0	0	100	100
C1_09	C1	2	0	98	100
C2_00	C2	19.6	5.2	75.2	100
C2_01	C2	27.381	38.0952	34.5238	100
C2_02	C2	19.6	46.4	34	100
C2_03	C2	17.2	34.8	48	100
C2_04	C2	31.6	24.4	44	100
C2_05	C2	9.7166	35.2227	55.0607	100
C2_06	C2	26	27.2	46.8	100
C2_07	C2	17.4274	27.8008	54.7718	100
C2_08	C2	10	16	74	100
C2_09	C2	11.6	14	74.4	100
C3_00	C3	6.96721	75.8197	17.2131	100
C3_01	C3	23.8494	59.8326	16.318	100
C3_02	C3	12.4	68.4	19.2	100
C3_03	C3	16.9421	59.0909	23.9669	100
C3_04	C3	6.22222	69.3333	24.4444	100
C3_05	C3	6.30252	72.2689	21.4286	100
C3_06	C3	10.3774	79.2453	10.3774	100
C3_07	C3	0.403226	93.9516	5.64516	100
C3_08	C3	6.72269	84.0336	9.2437	100
C3_09	C3	1.64609	89.7119	8.64198	100
